# Supplementary material for: Increased Collagen I/Collagen III Ratio Is Associated with Hemorrhage in Brain Arteriovenous Malformations in Human and Mouse
Source: MDPI journal article supplement (doi:10.3390/cells13010092), 2024-01-01
Supplement: s1 [file s1]

# Increased Collagen I/Collagen III Ratio Is Associated with Hemorrhage in Brain Arteriovenous Malformations in Human and Mouse

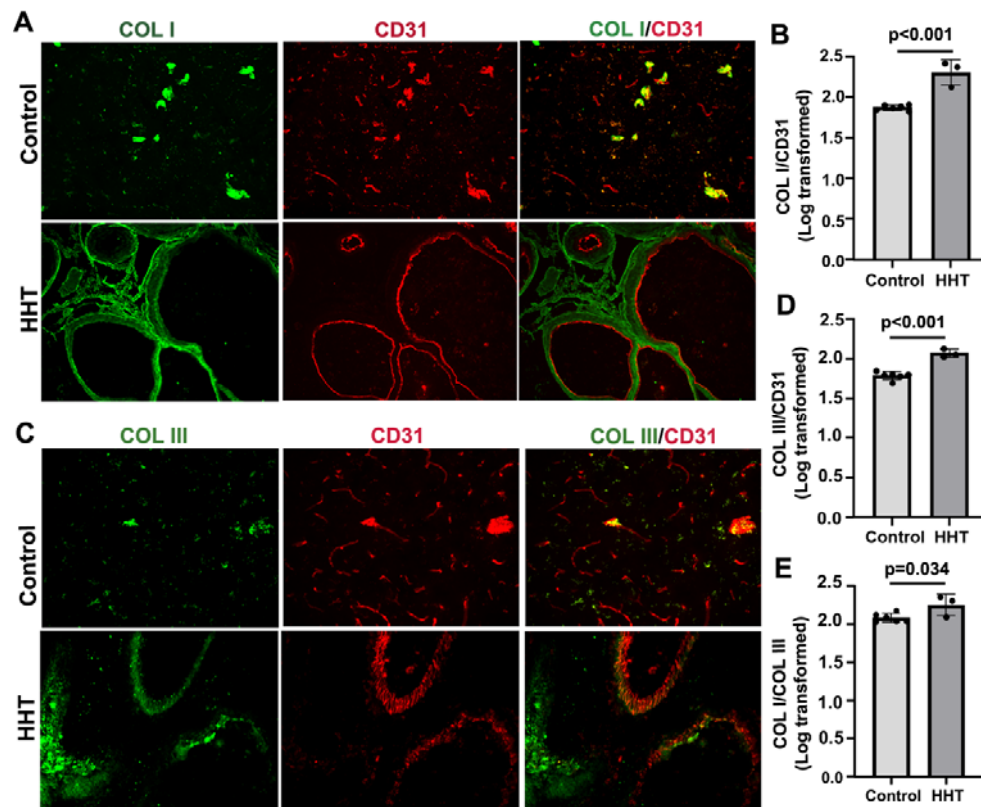

**Supplementary Figure S1:** COL I and COL III levels and COL I/ COL III ratio are higher in human HHT bAVMs compared to control. **A & C.** Representative images of COL I (green) and COL III (green). stained sections. ECs (red) were stained by an anti-CD31 antibody. **Scale bar**=50  $\mu$ m. **B & D.** Quantifications of COL I and COL III levels. **E.** Quantification of COL I/COL III ratio. N=6 for control, N=3 for HHT bAVMs.

**Supplemental Table S1.** Demographic information of individuals in the Sample group

| study_id | sex    | Cohort | Presentation | AGE | race               | ethnicity |
|----------|--------|--------|--------------|-----|--------------------|-----------|
| 112365   | male   | AVM    | Ruptured     | 51  | Asian              | No        |
| 112411   | male   | AVM    | Unruptured   | 61  | White              | No        |
| 112412   | female | AVM    | Ruptured     | 50  | More than one race | Yes       |
| 112430   | male   | AVM    | Unruptured   | 59  | White              | No        |
| 112442   | male   | AVM    | Ruptured     | 61  | White              | No        |
| 112496   | female | AVM    | Ruptured     | 52  | White              | No        |
| 112655   | female | AVM    | Unruptured   | 57  | White              | No        |
| 112678   | male   | AVM    | Ruptured     | 62  | White              | Yes       |
| 112761   | male   | AVM    | Unruptured   | 53  | White              | No        |

|        |        |          |            |      |                    |         |
|--------|--------|----------|------------|------|--------------------|---------|
| 113103 | female | AVM      | Unruptured | 51   | White              | No      |
| 113105 | female | AVM      | Unruptured | 46   | White              | Yes     |
| 113186 | female | AVM      | Ruptured   | 46   | White              | No      |
| 900000 | Male   | Epilepsy | Epilepsy   | 44   | White              | Unknown |
| 900015 | Male   | Epilepsy | Epilepsy   | 50   | White              | No      |
| 900015 | Male   | Epilepsy | Epilepsy   | 50   | White              | No      |
| 900032 | Female | Epilepsy | Epilepsy   | 46   | White              | Unknown |
| 900037 | Female | Epilepsy | Epilepsy   | 65   | White              | No      |
| 900073 | Female | Epilepsy | Epilepsy   | 55   | White              | No      |
| 112488 | Male   | HHT AVM  | Unruptured | 69.1 | White              | No      |
| 112823 | Female | HHT AVM  | Unruptured | 48.8 | White              | Yes     |
| 113098 | Male   | HHT AVM  | Unruptured | 9.1  | More than one race | Yes     |
